# Supplementary material for: Black-phosphorus crystal growth model deduced from the product distribution state under different process factors
Source: Royal Society of Chemistry journal article supplement (doi:10.1039/d3ce00205e), 2023-01-01
Supplement: d3ce00205e1.pdf [file d3ce00205e1.pdf]

**The black-phosphorus crystal growth model deduced from the product distribution state under different process factors**

**Wanying Liu<sup>a,\*</sup>, Yabo Zhu<sup>b</sup>, Sheng Chen<sup>c,\*</sup>, Xiaokuan Ban<sup>b</sup>, Xu Gu<sup>a</sup>, Feng Hu<sup>a</sup>, Lingchang Wang<sup>a</sup>,**

**Wenyuan Du<sup>a</sup>**

<sup>a</sup> School of Physics and New Energy, Xuzhou University of Technology, Xuzhou, Jiangsu, 221008, China;

<sup>b</sup> School of Physics and Materials, China University of Mining and Technology, Xuzhou, Jiangsu, 221008, China;

<sup>c</sup> School of Chemistry and Chemical Engineering, Nanjing University of Science and Technology, Nanjing, Jiangsu, 210094, China;

<sup>d</sup> Department of Materials Science and Engineering, University of Science and Technology of China, Hefei, Anhui, 230026, China;

\* Corresponding author. E-mail address: beckaliu@126.com (W. Y. Liu);

sheng.chen@njust.edu.cn (S. Chen)

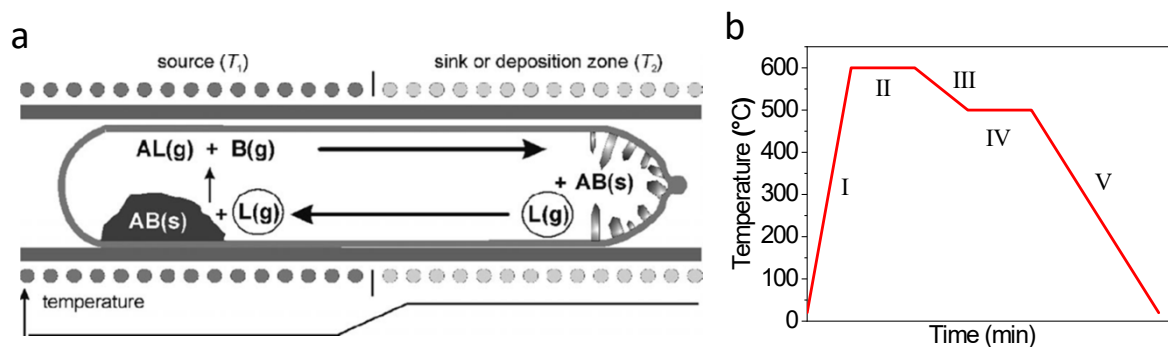

Fig. S1 (a) Schematic diagram of the transport process of substances by CVD method proposed by Schäfer; (b) Temperature program including five stages.

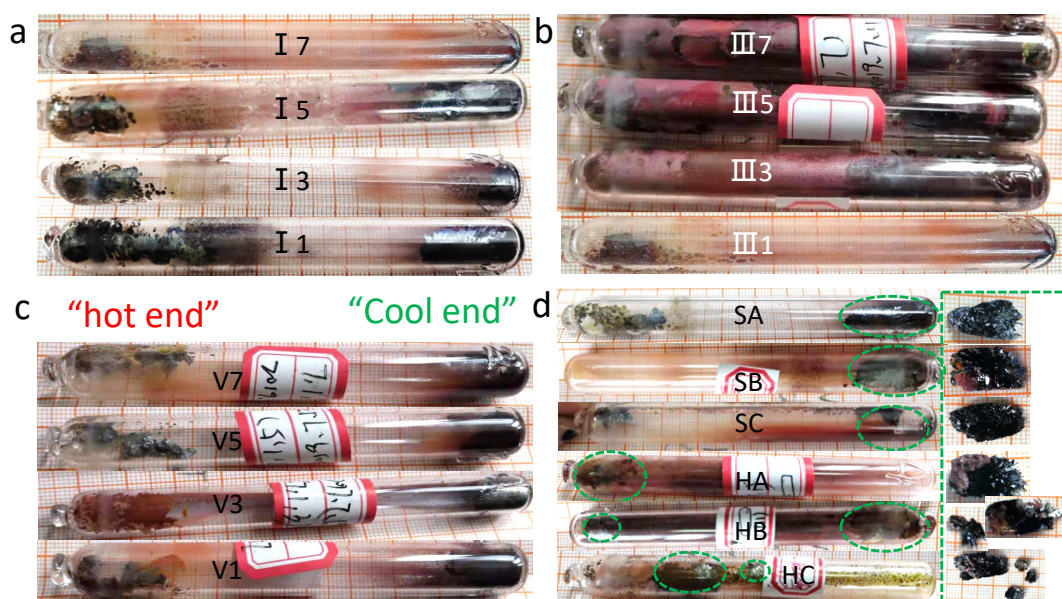

Fig. S2 Quartz tube photographs reflect (a) effect of temperature increasing rate on BP synthesis and yield in temperature stage I; (b) effect of temperature decreasing rate on BP synthesis and yield in temperature stage III; (c) effect of cooling rate on BP synthesis and yield in temperature stage V. (d) Quartz tube photographs under six types in Fig. S3.

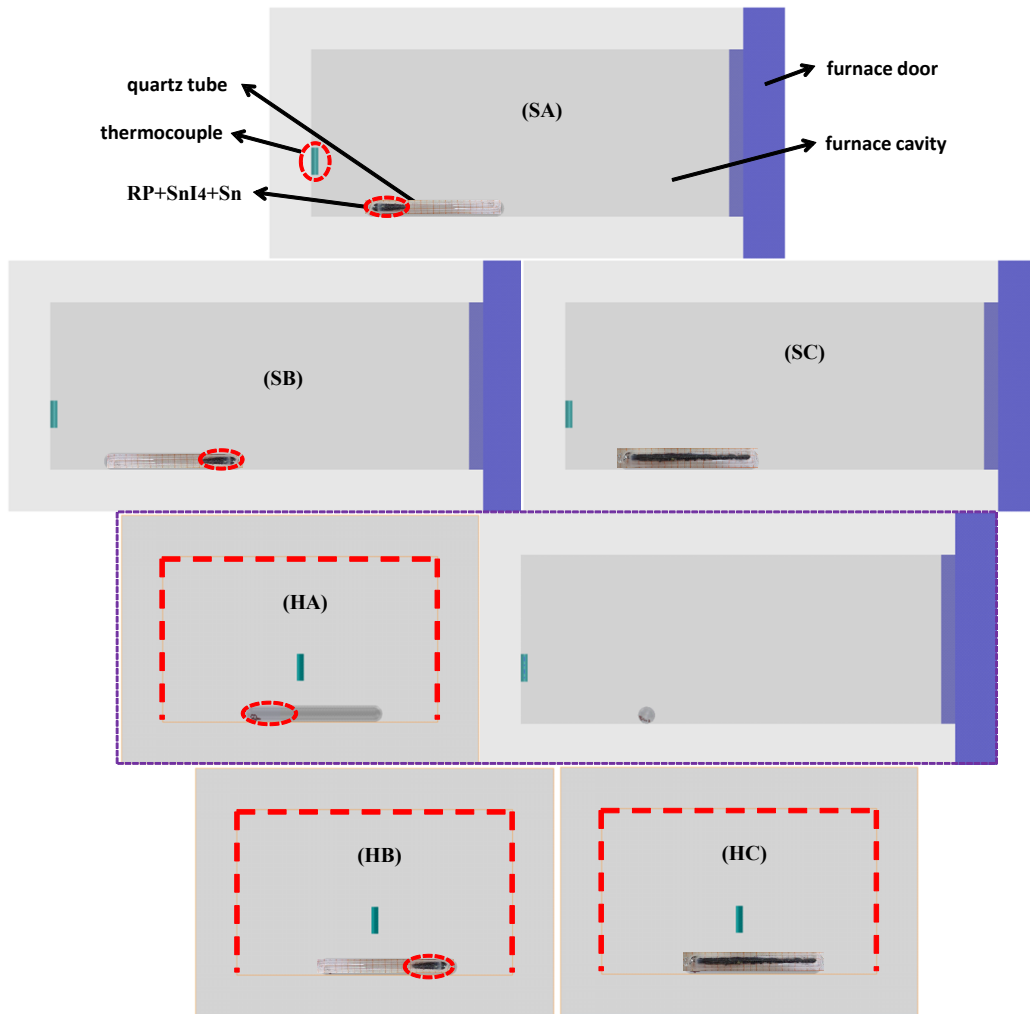

Fig. S3 The raw-material-distribution in quartz tube and quartz-tube- placement in muffle furnace: (SA) means that the raw materials are gathered at one end of the quartz tube, and material-gathered end of the quartz tube is placed away from the furnace door, and the quartz tube is placed longitudinally along the furnace chamber; (SB) means that raw materials are gathered at one end of the quartz tube, and the material-gathered end of the quartz tube is close to the furnace door, and the quartz tube is placed longitudinally along the furnace chamber; (SC) represents the raw materials are laid in the quartz tube, and the quartz tube is placed longitudinally along the furnace chamber; (HA) represents that the raw materials are gathered at one end of the quartz tube, and the quartz tube is placed laterally along the furnace chamber, and material-gathered end of the quartz tube faces to the left; (HB) means that the raw materials are gathered at one end of the quartz tube, and the quartz tube is placed laterally along the furnace chamber, and material-gathered end of the quartz tube faces to the right; (HC) means the raw materials are laid in the quartz tube, and the quartz tube is placed laterally along the furnace chamber.
